# Supplementary material
Source: Research Square preprint supplement (doi:10.21203/rs.3.rs-9368633/v1)

# A) Original gels from Figure 2

| minA<br>44 bp |                 | minB<br>88 bp |                 | Brca<br>44 bp |                 |
|---------------|-----------------|---------------|-----------------|---------------|-----------------|
| No Template   | 50 ng MDCK gDNA | No Template   | 50 ng MDCK gDNA | No Template   | 50 ng MDCK gDNA |

| minA<br>44 bp |                                    | minB<br>88 bp |                                    | Brca<br>44 bp |                                      |
|---------------|------------------------------------|---------------|------------------------------------|---------------|--------------------------------------|
| No Template   | 5 ul 1st round minA<br>PCR product | No Template   | 5 ul 1st round minB<br>PCR product | No Template   | 5 ul 1st round Brca11<br>PCR product |

Figure 2A

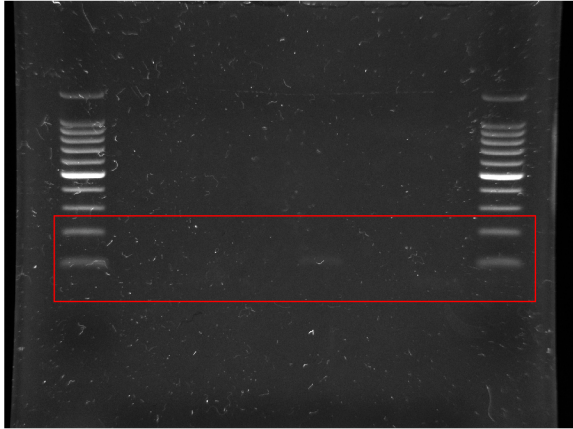

Figure 2B

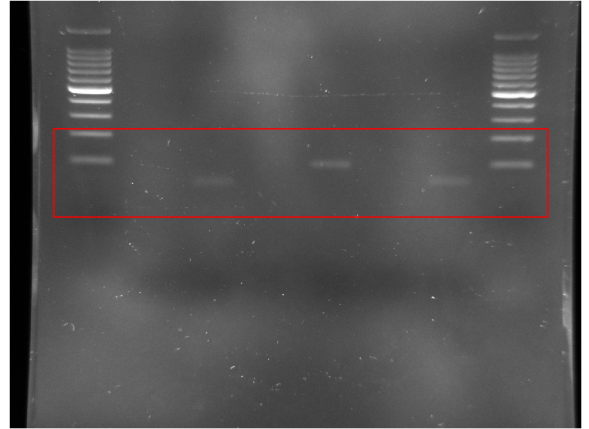

| minA<br>44 bp |                    | minB<br>88 bp |                    | Brca<br>44 bp |                    |
|---------------|--------------------|---------------|--------------------|---------------|--------------------|
| No Template   | 50 ng MDCK<br>gDNA | No Template   | 50 ng MDCK<br>gDNA | No Template   | 50 ng MDCK<br>gDNA |

Figure 2C

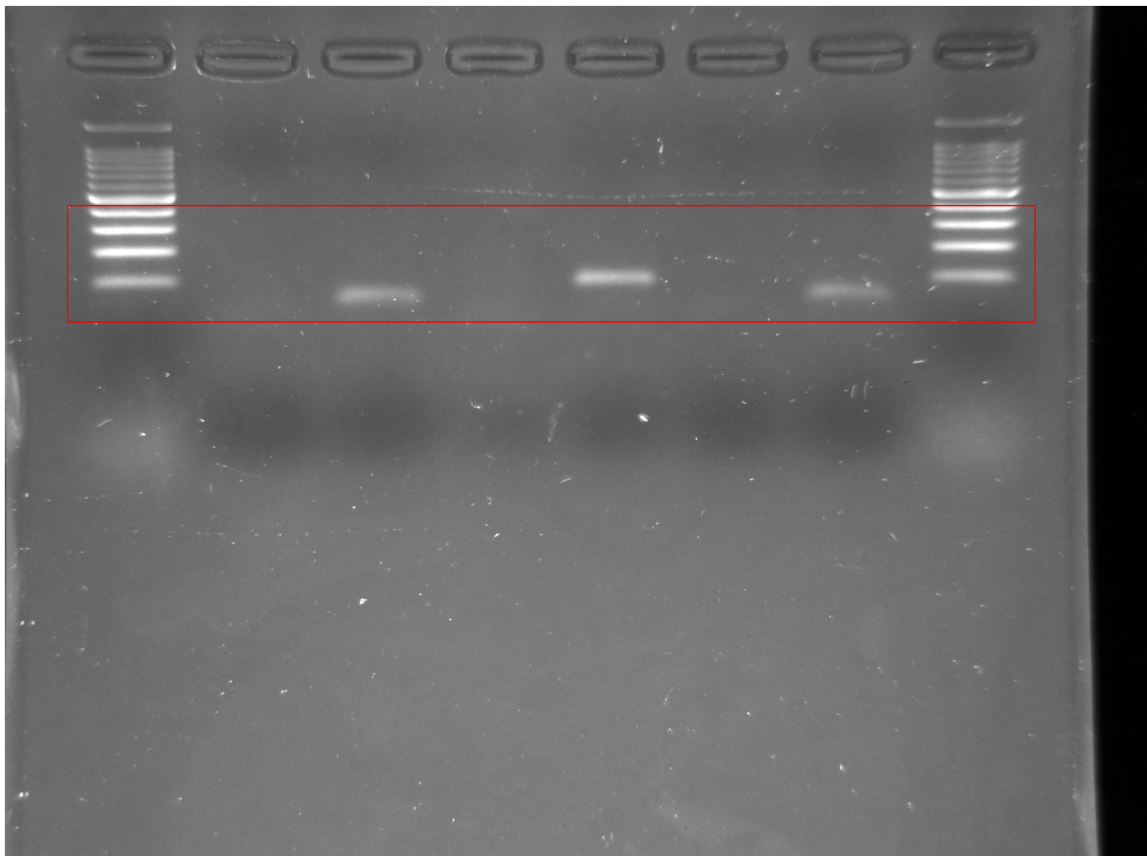

## B) Original gels from Figure 3

Figure 3A

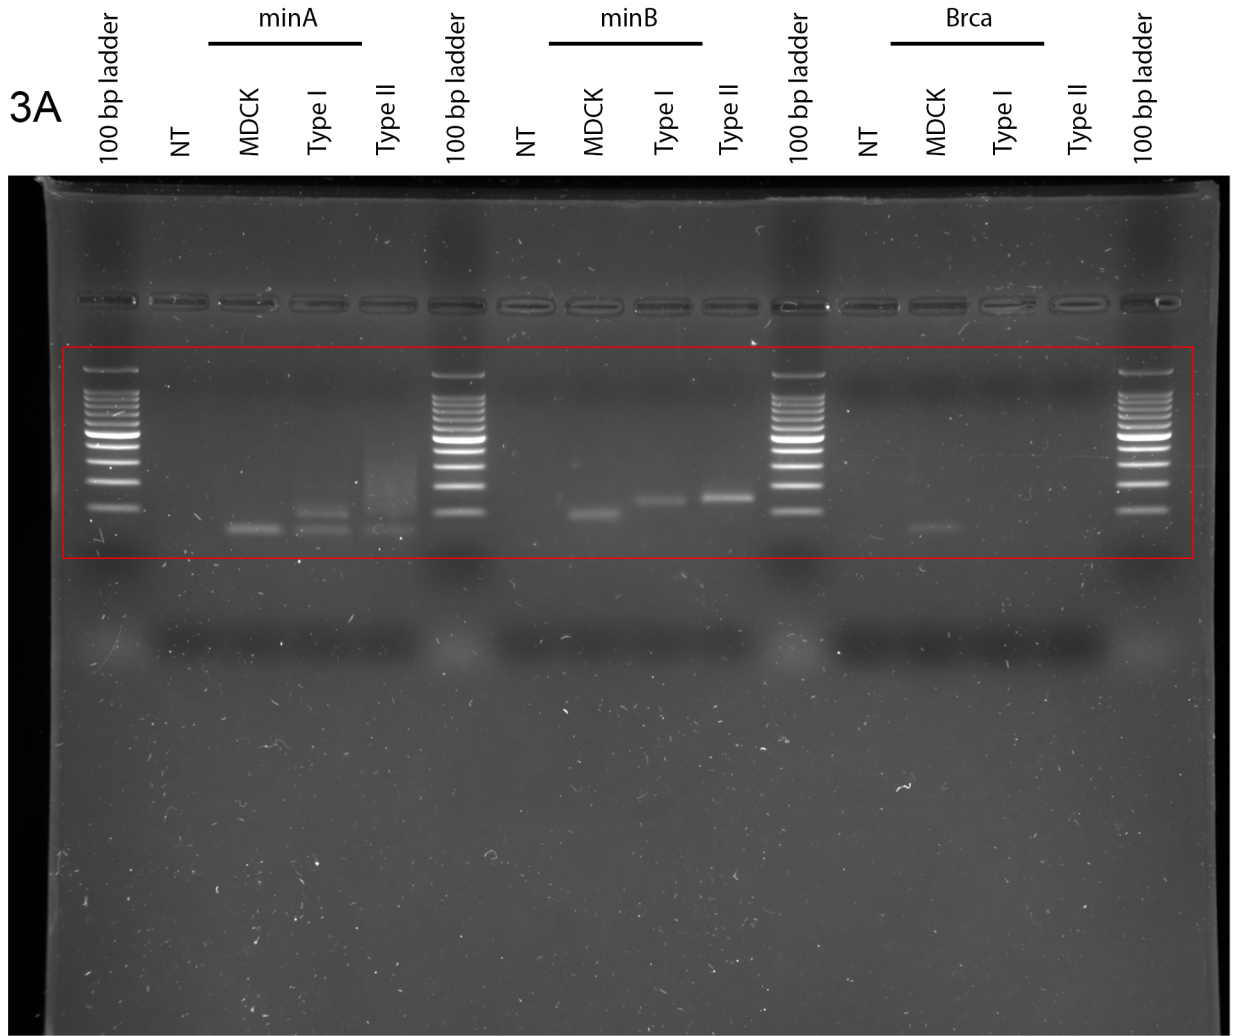

Figure 3B

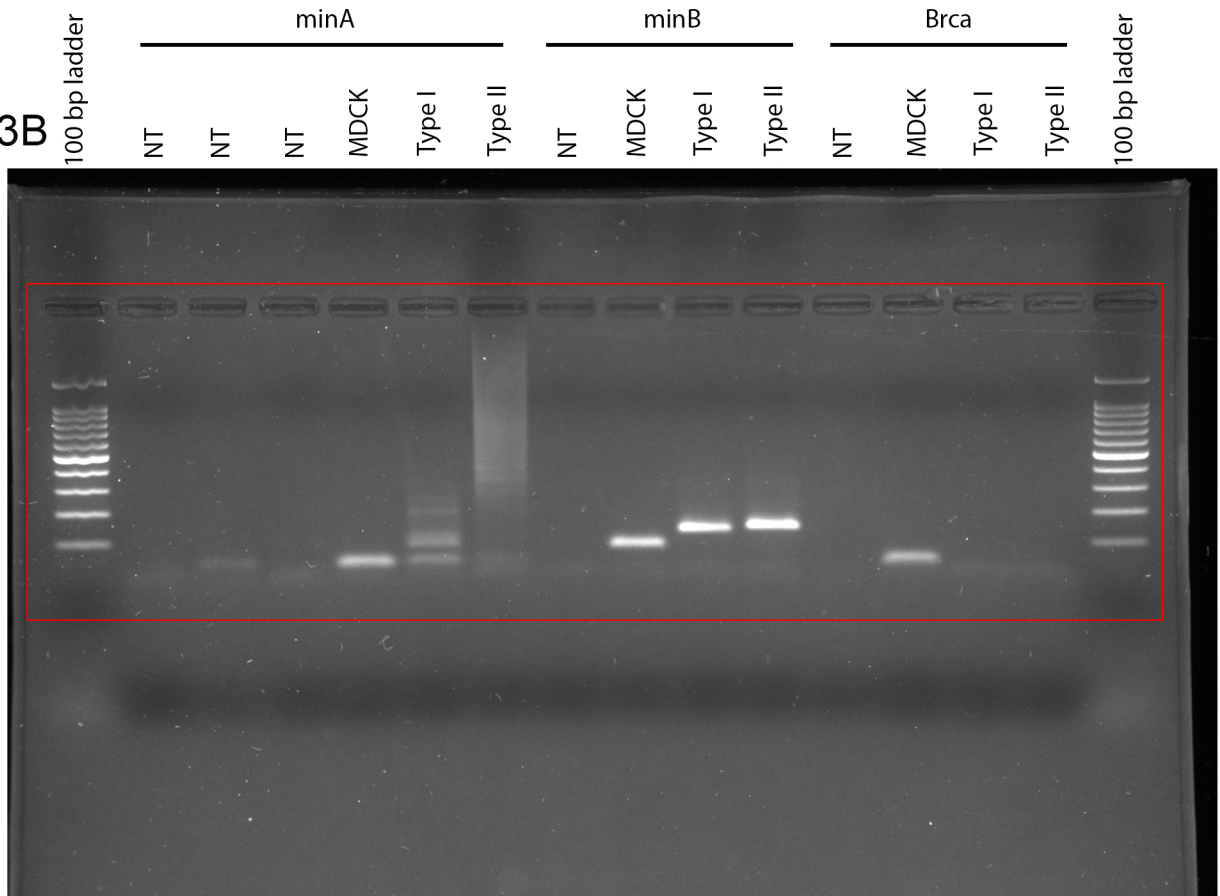

C) Original gels from Additional File 10

Additional File 10A

NT FP1 FP2 FP3 FP4 FP5 FP6

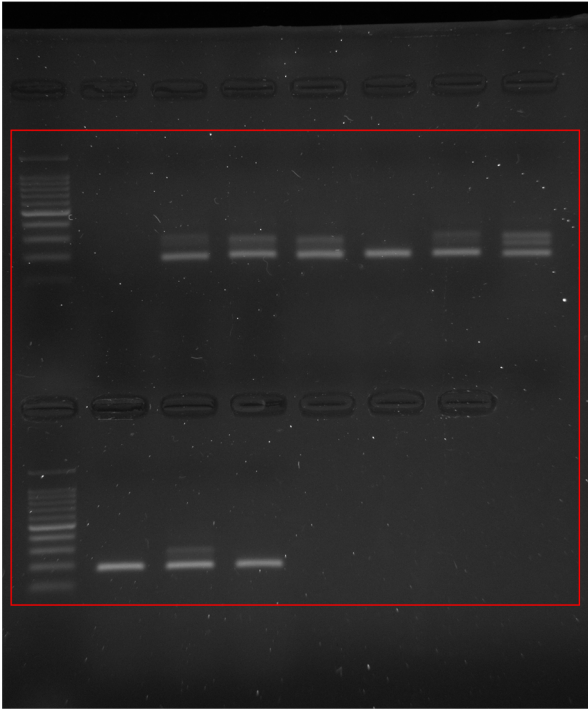

NT FP10 FP11 FP12 FP13 FP15

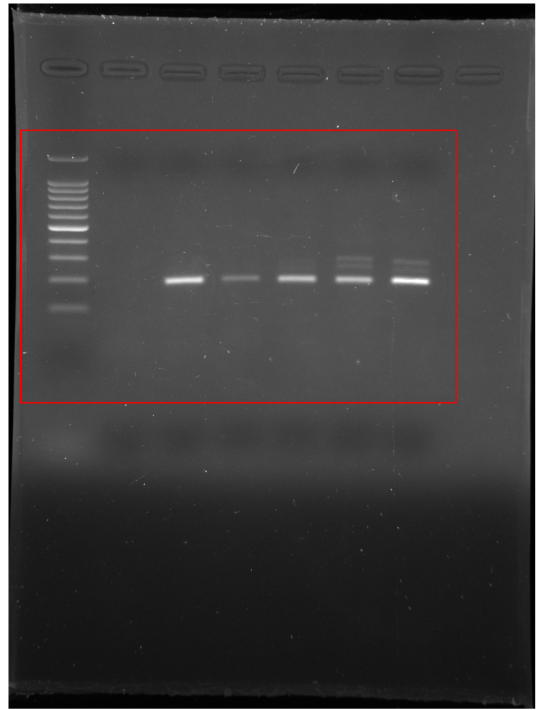

FP7 FP8 FP9

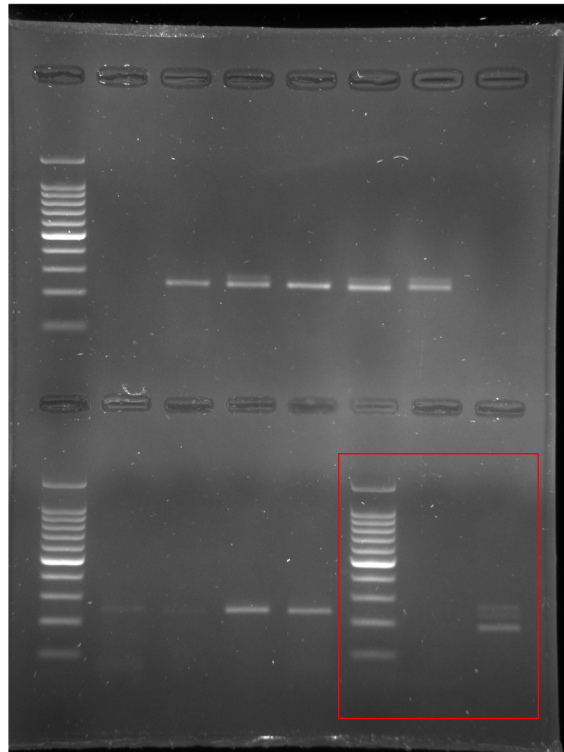

NT FP14

Additional File 10B

NT FP1 FP2 FP3 FP4 FP5 FP6 FP7 FP8 FP9 FP10 FP11 FP12 FP13 FP14 FP15

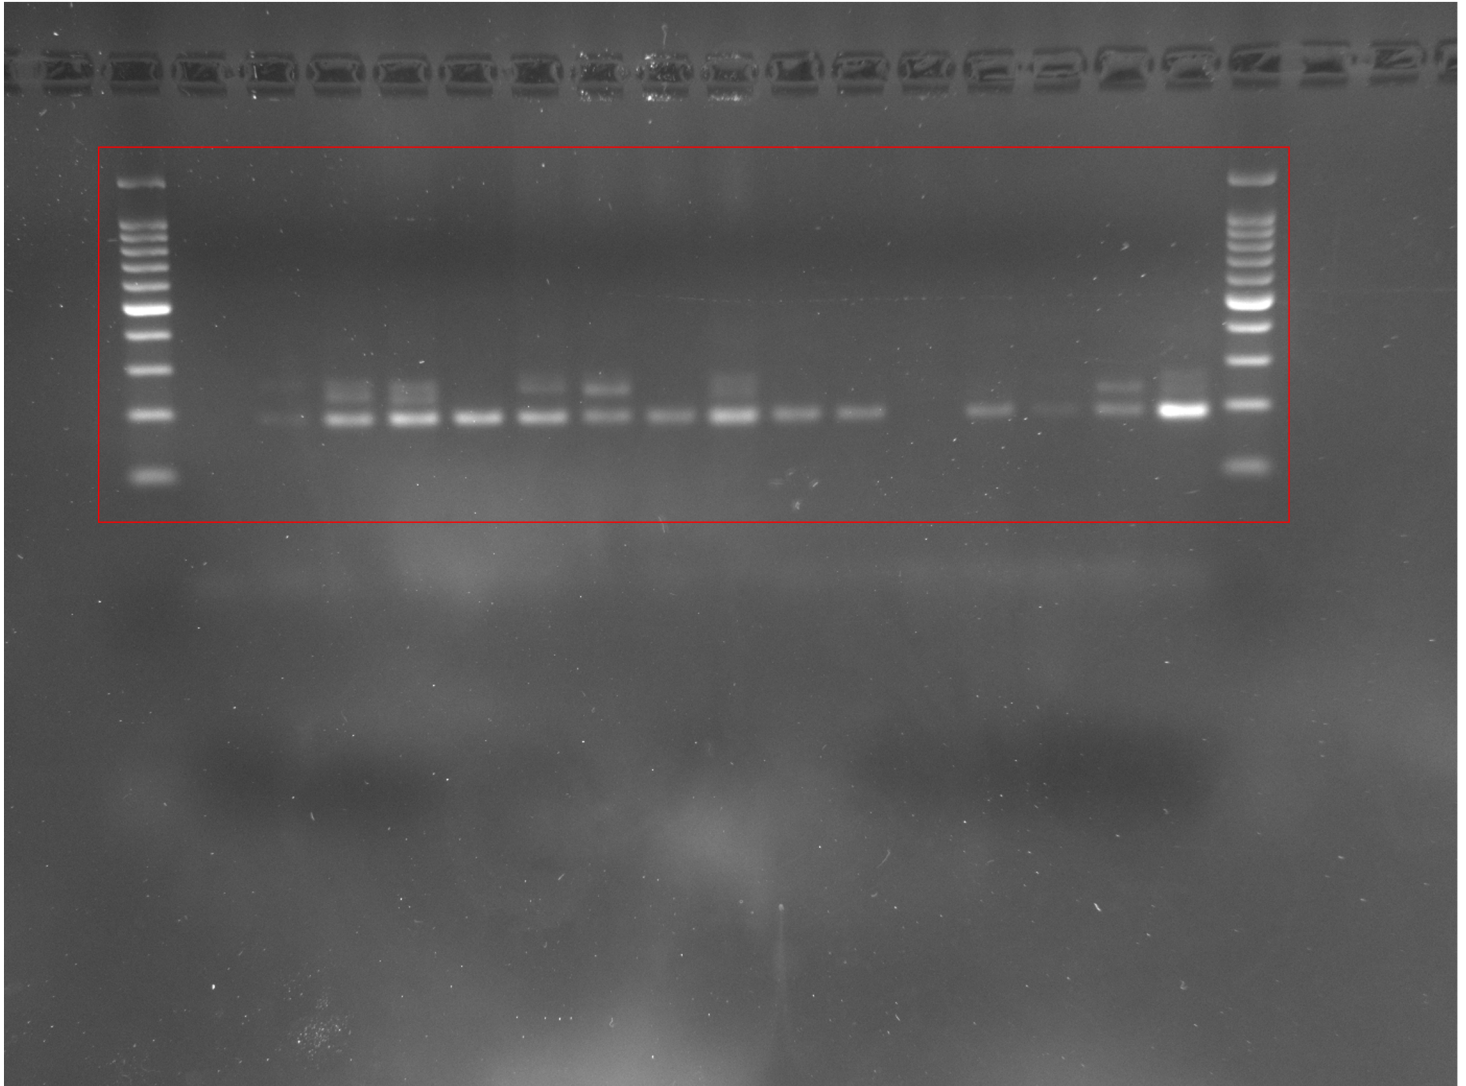

Supplement: Supplementary file 2 [file 236c20eb20e2d1a9dd903781.pdf]
