# Supplementary material
Source: Research Square preprint supplement (doi:10.21203/rs.3.rs-9368633/v1)
Supplement: Supplementary file 1 [file 1a7c5d32df89442b1a662f31.docx]

**Additional File Legends**

**Additional File 1: PCR primers, synthetic oligo target sequences and PCR conditions.**

**Additional File 2: Clinical samples used in the study.** Where exon 11 status (i.e. presence or absence of an ITD) had been confirmed prior to analysis in this study, this has been indicated.

**Additional File 3: Determining ITD structure from boundaries of superimposed sequences. (A)** Cartoon showing how misalignment of outputs from sanger sequencing can generate sequence traces shown in **(B)** and how they can be interpreted. **(i)** Sequencing from the forward whole exon 11 primer generates readable sequence starting close to the start of the 5’ internal tandem duplication (ITD), and then going on to include the 3’ ITD and the non-duplicated flanking region downstream. **(ii)** Some sequences are misaligned during data processing due to the identity of the 5’ and 3’ ITD. **(iii)** In the final sequence output, misaligned sequences become merged, with the 3’ ITD sequence of some reads superimposed on the non-duplicated flanking region of other reads. Importantly, the point at which the superimposed sequence begins must represent both the junction between the 5’ and 3’ ITD sequences and the point where the 3’ITD sequence ends and becomes non-duplicated downstream flanking region. A similar logic must apply to sequencing from the reverse whole exon 11 primer except that the sequence output is reverse and complementary. **(B)** Two sequencing chromatograms are shown, from tumour sample FP15, with sequences from the forward (exon 11F) and reverse / complementary (exon 11R) primers. The point at which good sequence in the forward chromatogram becomes poor sequence, where two traces are superimposed and marking the 3’ boundary of each part of the ITD, is shown by the red arrow (1) on the chromatogram. Similarly, the blue arrow (2) on the reverse / complementary chromatogram marks the 5’ boundary of each part of the ITD. One (3) represents the start of the 3’ section of the ITD, the other (4) represents the start of the non-duplicated downstream flanking region. See also **Additional File 4**.

**Additional File 4: Inferred structure of the FP15 ITD.** The arrows (1) to (4) correspond to the same sequence regions as indicated in **Additional File 3**. The structure of the FP15 ITD consists of a duplicated region bounded by the arrows (2) > (1). At the end of the first duplication there is a junction consisting of the sequence indicated by the arrows (1) > (3); at the end of the second duplication there is a junction consisting of the sequence indicated by the arrows (1) > (4).

**Additional File 5: Sequences of C2 canine mastocytomoa cell line and four canine MCTs (BK, EH, MK, MS) from London *et al*. (18).** The internal tandem duplication regions (ITD) are shown above each sequence, split into a 5’ and a 3’ section to indicate exactly the duplicated sequence. In most cases the ITD 5’ and ITD 3’ are identical, with the exception of the C2 sequence, which has a two nucleotide GA insertion in the 5’ sequence (indicated by a box), which is not present in the 3’ sequence (indicated by dashes). The red dotted lines in the C2 and MS sequences indicate the regions corresponding to synthetic ITD oligos generated to test the assay. The predicted PCR product sizes generated by the minA and minB primers are indicated. The sequences are grouped into ‘Type I’ duplications (in which only the forward minA primer binding site is duplicated) and ‘Type II’ duplications (in which both the forward and reverse minA primer sites are duplicated).

**Additional File 6: Alignment of Brca primers to *C. familiaris* BRCA1.** (A) Exon structure of *C. lupus familiaris* BRCA1 protein aligned against a consensus genomic DNA sequence. Nucleotide sequences of eight *C. lupus familiaris* BRCA1 protein splice isoforms predicted from build canFam3 (1: XP_013971930.1; 2: XP_013971932.1; 3: XP_005624371.1; 4: XP_022278220.1; 5: XP_022278221.1; 6: XP_022278222.1; 7: XP_013971933.1; 8: XP_013971934.1; downloaded from <https://www.ncbi.nlm.nih.gov/protein/>) aligned against a consensus sequence of *Canis lupus familiaris* *BRCA1* from canFam1, 2 and 3. The large central exon of *BRCA1*, which codes for the DNA-binding domain (36), is indicated. **(B)** The sequence of the 5’ terminus of the DNA binding domain of *BRCA1*, starting at *C.fam* chr9: 19,857,398 (UU_Cfam_GSD_1.0/canFam4) and the location of the Brca primer pair.

**Additional File 7: Primer dimer reactions with minA primers.** Melt curve profiles from a qPCR plate consisting of twenty-nine No Template reactions (red) and three MDCK gDNA template reactions (blue; 50ng per reaction). Twenty-four No Template reactions were sealed in the pre-PCR area before the MDCK template was added. Five were sealed afterwards. Results from each reaction are offset on the Y-axis for visibility but are in proportion with respect to each other. There were no amplification events in the five No Template wells sealed after the MDCK template was added to the plate, but in two out of twenty-four reactions sealed in the pre-PCR area (indicated) a low abundance amplification occurred (Ct values in the two No Template background reactions >37, compared to MDCK positive controls at 25 to 26) consistent with primer dimer formation.

**Additional File 8: MDCK standard curves melt curves. (A)** Melt curves from 5pg – 50ng minA / MDCK standard curve qPCR reactions shown in **Figure 4A**. **(B)** Melt curves from 5pg – 50ng minB / MDCK standard curve qPCR reactions shown in **Figure 4B**. **(C)** Melt curves from 5pg – 50ng Brca / MDCK standard curve qPCR reactions shown in **Figure 4C**.

**Additional File 9: H&E stained low-power overviews of FP tumour set with known *KIT* exon 11 status demonstrating presence of tumour tissue in sections** **(A)** Tumours with *KIT* exon 11 WT. Bar = 5mm. **(B)** Tumours with *KIT* exon 11 ITDs. Bar = 5mm. **(C)** Ratio of tumour tissue to total tissue area (determined from low power measurements in QuPath).

**Additional File 10: Gel analysis of whole *KIT* exon 11 standard PCR on FP samples. (A)** First set of PCRs using exon 11 primers on FP1 – FP15 samples, on three gels, with a No Template (NT) control on each. Each gel has a 100bp ladder with the 200bp band indicated. Samples known a priori to have an ITD are underlined. WT bands are indicated with arrows; the products resulting from the ITD with a red line. **(B)** Second set of PCRs using gDNA extracted from the FP tumour set. FP11 failed to amplify and the ITD products in FP12 and FP13 are barely distinguishable. Uncropped gel images are available in **Additional File 18**.

**Additional File 11: Ct and Tm values for minA, minB and Brca analysis of clinical samples.** Results for each primer set shown on a different tab. For each sample, Ct mean and SD values are given, as well as the number of replicates in the assay. MDCK gDNA was run as a control at least three times independently, and the values for all of these repeat assays are provided. For Brca, as in all cases there was only a single peak, a single Tm mean and SD value for that peak is provided. For minB, distinct WT and ITD peaks were observed in some cases (although in others the presence of an ITD merely resulted in a ‘shoulder’ on the peak) and where present the Tm mean and SD values for both of these are provided. For minA, when an ITD was present there was a distinct peak and the Tm mean and SD values for these are provided. In some cases, the ITD peak was split into two and the software reported a Tm value for both these ITD peaks; in such cases, only the highest Tm value is reported. The individual maximum derivative reporter values (‘strength of signal’) for each minA replicate are also shown for the samples with both a WT and ITD peak, as well as the ratio values for each replicate, on a separate tab (see **Figure 5**), as are the values for the direct comparison between minA and minA-ALT primers for FP5, FP6 and FP8 (see **Figure 7**).

**Additional File 12: Brca melting curves for clinical samples. (A)** Control MDCK melt curve. **(B)** Melt curves for KIT WT tumour samples. **(C)** Melt curves for tumour samples with KIT exon 11 ITDs.

**Additional File 13: Sequencing of WT KIT exon 11 PCR products from clinical samples.** Results of sequencing WT PCR products from whole exon 11 primers. **(A)** For all samples, the WT product was identical to the expected reference sequence, only showing variation at the 47,940,619 and 47,940,672 polymorphisms. **(B)** Genotyping at the polymorphisms was carried out by inspection of the sequencing chromatograms. Examples of a homozygous C/C, a heterozygous C/T and a homozygous T/T sequence at 47,940,619 are shown. **(C)** Results of genotyping for all samples at the 47,940,619 and 47,940,672 loci. FP11 failed to produce sequence of sufficient quality for analysis. See **Additional File 14** and **Additional File 15**.

**Additional File 14: FASTA sequences of *KIT* exon 11 ITDs shown in Additional File 15.**

**Additional File 15: Features of clinical sample ITDs. (A)** Alignment of ITD sequences from clinical cases against a WT reference sequence. The location of the minA and minB priming sites are indicated, as SNPs 619 and 672 (note SNP 619 is duplicated along with the FminA site) and the exon-intron boundary. **(B)** Clinical sample genotypes, showing both the genotype of the ITD sequence and the associated germline (WT) sequence. *SNP 619 is duplicated in the ITDs; the allele is always the same at both copies. ND, sample quality too poor for interpretation. Alleles in brackets could not be directly determined from the ITD sequence but were inferred from the germline/WT. ITD genotypes are shown as single allele variants, as the LOH evidence suggests the duplication occurs on only one of the chromosomes in a pair, except for FP6 which is shown as C/n, as it may be read from the sequencing as either C/A or C (see **Additional File 14** and **Additional File 16**).

**Additional File 16: Loss-Of-Heterozygousity in ITDs, allele frequencies and ITD detection efficiency. (A)** Sequencing chromatograms from WT and ITD sequences of FP1 and FP6, showing LOH at SNP 672 in FP1 and at SNP619 in FP6. For SNP 672 in FP6 both the forward and reverse / complementary traces are shown, illustrating the C/A trace in the forward sequence and the G in the reverse / complementary, which equates to C. The C/A read may be an artefact, of the PCR amplification or sequencing, or evidence of tumour heterogeneity.

**Additional File 17: The minB-ALT variant primers can enhance detection in tumours with allelic variants at polymorphic loci.** qPCR melt curves for samples analysed using the alternative minB-ALT reverse primercompared to the standard primers. WT and ITD genotypes are shown on each melt curve and the primer sequences are provided (note minB / minB-ALT primer sequences are reverse and complimentary to the genotypes on the melt curves). There is little difference between the minB and minB-ALT reactions in tumours which are germline homozygous for SNP 672 and in which the ITD therefore has the same genotype, irrespective of whether this is C or T. However, in tumour FP2, from a germline C/T heterozygous animal, then use of the minB-ALT primer substantially enhanced ITD detection (red arrow), although the genotype of the ITD at SNP 672 could not be determined. In contrast, in FP1, also from a germline C/T heterozygous animal but with an ITD known to be C at SNP 672, the minB-ALT primer enhanced the ITD signal only slightly (red arrow).

**Additional File 18: Uncropped gel images from Figure 2, Figure 3 and Additional File 10. (A)** Gels from Figure 2. **(B)** Gels from Figure 3. **(C)** Gels from Additional File 10. Cropped areas are indicated by red boxes. Note the additional PCR bands in the third gel from Additional File 10A which have been cropped out of the Figure are not *KIT* exon 11 PCR analyses. Rather, they are a set of KIT exon 8 PCRs which were run on the same gel but not relevant to the study reported here and therefore cropped out of the image as shown in Additional File 10.
