# Supplementary material
Source: Research Square preprint supplement (doi:10.21203/rs.3.rs-9368633/v1)
Supplement: Supplementary file 2 [file 6744ac45fd9fd01f72b903b7.xlsx]

## Sheet: minA
minA
Sample	ITD status	Ct mean	CT SD	Melting curves				n
				Tm WT mean (oC)	Tm WT SD (oC)	Tm ITD mean (oC)	Tm ITD SD (oC)
MDCK (A)	N/A	27.0669	0.450192	73.3108	0.0562585	N/A	N/A	3
MDCK (B)	N/A	27.4813	0.124739	73.4986	0.0562277	N/A	N/A	3
MDCK (C)	N/A	26.6483	0.142341	72.822	0.0562629	N/A	N/A	3
FP1	ITD	25.3522	0.188254	72.3039	0.0974426	79.7745	0.0562585	3
FP2	ITD	23.7067	0.148896	72.2714	0.0562585	78.5077	0.0562541	3
FP3	ITD	24.0493	0.279619	72.4013	0	77.5658	0	3
FP4	WT	26.5041	0.133877	73.0834	0	N/A	N/A	3
FP5	ITD	31.4802	0.338515	72.6287	0.0562585	79.6121	0	3
FP6	ITD	27.706	0.244729	73.1809	0	78.6377	0.0975004	3
FP7	WT	25.0131	0.0329157	73.3433	0.0562585	N/A	N/A	3
FP8	ITD	31.0712	0.246644	72.8561	0.0562585	78.2479	0	3
FP9	WT	32.7594	0.171613	72.986	0	N/A	N/A	3
FP10	WT	27.1611	0.0440917	73.0441	0.0562321	N/A	N/A	3
FP11	WT	37.4529	0.285063	72.0377	0.0562277	N/A	N/A	3
FP12	ITD	26.813	0.191355	73.0441	0.0562321	78.0111	0.0562277	3
FP13	ITD	26.5238	0.0341059	72.9142	0.0562277	79.6343	0.0562321	3
FP14	ITD	25.8407	0.129554	72.0424	0.0562629	77.7919	0.0562629	3
FP15	ITD	25.4871	0.073975	73.109	0.0562277	78.8227	0	3

## Sheet: minB
minB
Sample	ITD status	Ct mean	CT SD	Melting curves				n
				Tm WT mean (oC)	Tm WT SD (oC)	Tm ITD mean (oC)	Tm ITD SD (oC)
MDCK (A)	N/A	26.9562	0.0307512	77.8906	0.0562585	N/A	N/A	3
MDCK (B)	N/A	25.8359	0.0392649	78.076	0.0562321	N/A	N/A	3
MDCK (C)	N/A	24.4604	0.201069	77.7919	0.0562629	N/A	N/A	3
FP1	ITD	26.8857	0.089034	77.7282	0.0562585	N/A	N/A	3
FP2	ITD	24.4215	0.0593305	77.7282	0.0562585	N/A	N/A	3
FP3	ITD	25.843	0.293834	77.7931	0.0562585	N/A	N/A	3
FP4	WT	26.1742	0.0538906	77.8256	0.0562585	N/A	N/A	3
FP5	ITD	26.9616	0.101029	77.2085	0.0562585	80.4241	0.0562585	3
FP6	ITD	28.1205	0.127651	77.569	0.0926499	79.8069	0	3	0.089	0.075	0.075
FP7	WT	27.41	0.24	78.0205	0.0562585	N/A	N/A	3
FP8	ITD	26.62	0.11868	77.3709	0	N/A	N/A	3
FP9	WT	27.4917	0.224998	77.4034	0.0562585	N/A	N/A	3
FP10	WT	27.8536	0.13536	77.4917	0.0562321	N/A	N/A	3
FP11	WT	30.5969	0.155921	77.1021	0.0562277	N/A	N/A	3
FP12	ITD	27.2235	0.0505019	77.8488	0	N/A	N/A	3
FP13	ITD	28.6769	0.0474912	77.8488	0	80.771	0	3
FP14	ITD	28.665	0.348403	77.597	0.0562629	79.4486	0.0562629	3
FP15	ITD	24.8369	0.0930811	78.0436	0	N/A	N/A	3

## Sheet: Brca
Brca
Sample	ITD status	Ct mean	CT SD	Melting curves		n
				Tm WT mean (oC)	Tm WT SD (oC)
MDCK (B)	N/A	27.0436	0.0575541	71.778	0.0562321	3
MDCK (C)	N/A	25.967	0.214256	71.815	0.0974503	3
MDCK (D)	N/A	27.3878	0.62462	71.8263	0.0566153	3
FP1	ITD	28.202	0.120518	71.4667	0.0566197	3
FP2	ITD	25.7528	0.171668	71.4994	0	3
FP3	ITD	25.4422	0.127544	71.5648	0.0566153	3
FP4	WT	27.0582	0.283392	71.5974	0	3
FP5	ITD	26.6254	0.155757	71.6955	0	3
FP6	ITD	27.2875	0.0541589	71.7936	0	3
FP7	WT	26.6477	0.183163	71.859	0.0566153	3
FP8	ITD	25.7565	0.150605	71.8916	0	3
FP9	WT	27.287	0.159772	71.859	0.0566153	3
FP10	WT	27.1616	0.117267	71.8429	0.0562277	3
FP11	WT	30.589	0.601722	71.8429	0.0562277	3
FP12	ITD	27.7085	0.159994	71.9078	0	3
FP13	ITD	28.3784	0.277487	71.9403	0.0562321	3
FP14	ITD	28.3789	0.130011	71.815	0	3
FP15	ITD	26.0805	0.148618	71.9403	0.0562321	3

## Sheet: minA ITD Peak derivative values
Plate 1
Well	Well Position	Sample Name	Target Name	CT	Ct Mean	Ct SD	TmWT	PdWT	TmITD	PdITD	PdITD/PdWT	Mean ratio	SD ratio
1	A1	FP1	MinA	25.5678	25.3522	0.188254	72.4013	0.607	79.7095	0.797	1.31301	1.54566	0.20149
13	B1	FP1	MinA	25.2689	25.3522	0.188254	72.2064	0.503	79.8069	0.837	1.66402	1.54566	0.20149
25	C1	FP1	MinA	25.22	25.3522	0.188254	72.3039	0.497	79.8069	0.825	1.65996	1.54566	0.20149
2	A2	FP2	MinA	23.8786	23.7067	0.148896	72.2064	0.492	78.4428	0.835	1.69715	1.72027	0.0206116
14	B2	FP2	MinA	23.6228	23.7067	0.148896	72.3039	0.49	78.5402	0.851	1.73673	1.72027	0.0206116
26	C2	FP2	MinA	23.6187	23.7067	0.148896	72.3039	0.52	78.5402	0.898	1.72692	1.72027	0.0206116
3	A3	FP3	MinA	24.3713	24.0493	0.279619	72.4013	0.53	77.5658	0.813	1.53396	1.5622	0.0273574
15	B3	FP3	MinA	23.8677	24.0493	0.279619	72.4013	0.523	77.5658	0.818	1.56405	1.5622	0.0273574
27	C3	FP3	MinA	23.9088	24.0493	0.279619	72.4013	0.508	77.5658	0.807	1.58858	1.5622	0.0273574
5	A5	FP5	MinA	31.8247	31.4802	0.338515	72.6937	0.704	79.6121	0.382	0.542614	0.624988	0.0810928
17	B5	FP5	MinA	31.1481	31.4802	0.338515	72.5962	0.718	79.6121	0.506	0.704735	0.624988	0.0810928
29	C5	FP5	MinA	31.4678	31.4802	0.338515	72.5962	0.717	79.6121	0.45	0.627615	0.624988	0.0810928
6	A6	FP6	MinA	27.9236	27.706	0.244729	73.1809	0.757	78.735	0.0892624	0.117916	0.105681	0.010622
18	B6	FP6	MinA	27.441	27.706	0.244729	73.1809	0.743	78.6376	0.074525	0.100303	0.105681	0.010622
30	C6	FP6	MinA	27.7533	27.706	0.244729	73.1809	0.763	78.54	0.0754018	0.0988229	0.105681	0.010622
8	A8	FP8	MinA	31.336	31.0712	0.246644	72.7911	0.728	78.2479	0.39	0.535714	0.468915	0.0896725
20	B8	FP8	MinA	31.0297	31.0712	0.246644	72.8885	0.703	78.2479	0.258	0.366999	0.468915	0.0896725
32	C8	FP8	MinA	30.848	31.0712	0.246644	72.8885	0.744	78.2479	0.375	0.504032	0.468915	0.0896725
Plate 2
Well	Well Position	Sample Name	Target Name	CT	Ct Mean	Ct SD	TmWT	PdWT	TmITD	PdITD	PdITD/PdWT	Mean ratio	SD ratio
3	A3	FP12	MinA	27.0004	26.813	0.191355	72.9791	0.981	77.9462	0.269	0.27421	0.29811	0.0484853
15	B3	FP12	MinA	26.6179	26.813	0.191355	73.0765	1.037	78.0436	0.367	0.353905	0.29811	0.0484853
27	C3	FP12	MinA	26.8209	26.813	0.191355	73.0765	1.033	78.0436	0.275	0.266215	0.29811	0.0484853
4	A4	FP13	MinA	26.5476	26.5238	0.0341059	72.8817	1.193	79.6018	0.568	0.476111	0.479458	0.012364
16	B4	FP13	MinA	26.539	26.5238	0.0341059	72.8817	1.022	79.6018	0.504	0.493151	0.479458	0.012364
28	C4	FP13	MinA	26.4847	26.5238	0.0341059	72.9791	1.036	79.6992	0.486	0.469112	0.479458	0.012364
5	A5	FP15	MinA	25.5592	25.4871	0.073975	73.0765	1.064	78.8227	0.476	0.447368	0.423663	0.0210429
17	B5	FP15	MinA	25.4906	25.4871	0.073975	73.0765	1.029	78.8227	0.419	0.407191	0.423663	0.0210429
29	C5	FP15	MinA	25.4114	25.4871	0.073975	73.1739	1.047	78.8227	0.436	0.416428	0.423663	0.0210429
Plate 3
Well	Well Position	Sample Name	Target Name	CT	Ct Mean	Ct SD	TmWT	PdWT	TmITD	PdITD	PdITD/PdWT	Mean ratio	SD ratio
1	A1	FP14	MinA	25.7093	25.8407	0.129554	72.0099	1.034	77.7594	1.162	1.12379	1.10725	0.0504463
13	B1	FP14	MinA	25.9683	25.8407	0.129554	72.0099	0.988	77.7594	1.038	1.05061	1.10725	0.0504463
25	C1	FP14	MinA	25.8446	25.8407	0.129554	72.1073	0.923	77.8569	1.059	1.14735	1.10725	0.0504463

## Sheet: minA vs minA-ALT peak values
Well	Well Position	Sample Name	Target Name	CT	TmWT	PdWT	TmITD	PdITD	PdITD/PdWT	Mean ratio	SD ratio
3	A3	FP5	minA	31.6851	72.598	1.15	79.5167	0.643	0.55913	0.542663	0.0441789
15	B3	FP5	minA	31.7481	72.598	1.187	79.5167	0.684	0.576243	0.542663	0.0441789
27	C3	FP5	minA	32.0318	72.6954	1.151	79.6142	0.567	0.492615	0.542663	0.0441789
39	D3	FP5	minA-ALT	26.3574	71.3312	0.711	79.4193	1.232	1.73277	1.65872	0.06461
51	E3	FP5	minA-ALT	26.4059	71.4286	0.764	79.4193	1.245	1.62958	1.65872	0.06461
63	F3	FP5	minA-ALT	26.1083	71.2337	0.883	79.3218	1.425	1.61382	1.65872	0.06461
4	A4	FP6	minA	27.0862	72.9878	1.192	78.6397	0.292	0.244966	0.192773	0.048513
16	B4	FP6	minA	27.006	73.0852	1.221	78.64	0.182	0.149058	0.192773	0.048513
28	C4	FP6	minA	26.9315	73.0852	1.248	78.64	0.23	0.184295	0.192773	0.048513
40	D4	FP6	minA-ALT	25.8877	70.9414	0.414	80.4912	1.249	3.01691	2.98047	0.0684544
52	E4	FP6	minA-ALT	25.8384	70.9414	0.435	80.4912	1.315	3.02299	2.98047	0.0684544
64	F4	FP6	minA-ALT	25.7725	70.8439	0.467	80.3937	1.355	2.9015	2.98047	0.0684544
5	A5	FP8	minA	30.5769	72.9878	1.078	78.055	0.313	0.290353	0.26684	0.0207983
17	B5	FP8	minA	30.4141	72.9878	1.18	78.055	0.296	0.250847	0.26684	0.0207983
29	C5	FP8	minA	30.1537	72.9878	1.207	78.1525	0.313	0.259321	0.26684	0.0207983
41	D5	FP8	minA-ALT	26.4512	71.4286	0.743	77.8601	1.118	1.50471	1.45826	0.0503619
53	E5	FP8	minA-ALT	26.2015	71.4286	0.887	77.9576	1.246	1.40474	1.45826	0.0503619
65	F5	FP8	minA-ALT	26.2136	71.4286	0.851	77.8601	1.247	1.46533	1.45826	0.0503619
