# Supplementary material
Source: Research Square preprint supplement (doi:10.21203/rs.3.rs-9368633/v1)
Supplement: Supplementary file 3 [file edb85890fce2cbadb9046f57.xlsx]

## Sheet: Sheet1
Sample	Type	Source	Breed	Age at sampling (years)	Diagnosis	Exon 11 status
FP1	FFPE block	FP1	Labrador retriever	4	Mast cell tumour, low grade (Kiupel) / grade II (Patnaik); mass from ear.	Positive for exon 11 ITD
FP2	FFPE block	FP1	Lurcher	10	Mast cell tumour, grade II (Patnaik), but HN2 (early metastasis) in lymph node; digit.	Positive for exon 11 ITD
FP3	FFPE block	FP1	Crossbreed	11	Mast cell tumour, high grade (Kiupel and Patnaik); perianal.	Positive for exon 11 ITD
FP4	FFPE block	FP1	Pug	7	Mast cell tumour, subcutaneous; left elbow.	Negative for exon 11 ITD
FP5	FFPE block	FP1	French bulldog	6	Mast cell tumour, high grade (Kiupel and Patnaik); location not specified.	Positive for exon 11 ITD
FP6	FFPE block	FP1	Mastiff	7	Mast cell tumour, high grade (Kiupel and Patnaik); left flank.	Positive for exon 11 ITD
FP7	FFPE block	FP1	Labrador retriever	7	Mast cell tumour, subcutaneous; left shoulder.	Negative for exon 11 ITD
FP8	FFPE block	FP1	French bulldog	Not known	Mast cell tumour, low grade (Kiupel) / grade II (Patnaik); right hind limb.	Positive for exon 11 ITD
FP9	FFPE block	FP1	Pug	4	Mast cell tumour, low grade (Kiupel) / grade II (Patnaik); limb.	Negative for exon 11 ITD
FP10	FFPE block	FP1	Dachshund	4	Mast cell tumour, subcutaneous; right thigh.	Negative for exon 11 ITD
FP11	FFPE block	FP1	Not specified	3	Mast cell tumour, low grade (Kiupel) / grade II (Patnaik); preputial.	Negative for exon 11 ITD
FP12	FFPE block	FP1	German short-haired pointer	6	Mast cell tumour, high grade (Kiupel and Patnaik); location not specified.	Positive for exon 11 ITD
FP13	FFPE block	FP1	Pointer	<1	Mast cell tumour, low grade (Kiupel) / grade II (Patnaik); right thigh.	Positive for exon 11 ITD
FP14	FFPE block	FP1	Labrador retriever	13	Mast cell tumour, low grade (Kiupel) / grade II (Patnaik); right hind limb.	Positive for exon 11 ITD
FP15	FFPE block	FP1	Crossbreed	9	Mast cell tumour, low grade (Kiupel) / grade II (Patnaik); left axilla.	Positive for exon 11 ITD
		1Finn Pathologists, Harleston, Norfolk, UK.
