# Supplementary material
Source: Research Square preprint supplement (doi:10.21203/rs.3.rs-9368633/v1)
Supplement: Supplementary file 4 [file fef839e74491177b9f230077.xlsx]

## Sheet: Assay primers
Name	Target	Sequence	Length	%GC	Expected wild type product
Exon 11F	NM_001003181 Canis lupus familiaris KIT, UU_Cfam_GSD_1.0/canFam4 chromosome 13 (47,940,537 - 47,940,559)	CCATGTATGAAGTACAGTGGAAG	23	0.43	189
Exon 11R	NM_001003181 Canis lupus familiaris KIT, UU_Cfam_GSD_1.0/canFam4 chromosome 13 (47,940,70 - 47,940,725)	GTTCCCTAAAGTCATTGTTACACG	24	0.42
FminA	NM_001003181 Canis lupus familiaris KIT, UU_Cfam_GSD_1.0/canFam4 chromosome 13 (47,940,611 - 47,940,631)	CTTCCTTACGATCACAAATGG	21	0.43	44
FminA-ALT	NM_001003181 Canis lupus familiaris KIT, UU_Cfam_GSD_1.0/canFam4 chromosome 13 (47,940,611 - 47,940,631)	CTTCCTTATGATCACAAATGG	21
RminA	NM_001003181 Canis lupus familiaris KIT, UU_Cfam_GSD_1.0/canFam4 chromosome 13 (47,940,632 - 47,940,654)	CTCAGCCTGTTTCTGGGAAACTC	23	0.52
FminB	NM_001003181 Canis lupus familiaris KIT, UU_Cfam_GSD_1.0/canFam4 chromosome 13 (47,940,590 - 47,940,610)	GTTTACATAGACCCAACACAG	21	0.43	88
RminB	NM_001003181 Canis lupus familiaris KIT, UU_Cfam_GSD_1.0/canFam4 chromosome 13 (47,940,655 - 47,940,677)	CCCCTATTTCATACTGACCAAAG	23	0.43
RminB-ALT	NM_001003181 Canis lupus familiaris KIT, UU_Cfam_GSD_1.0/canFam4 chromosome 13 (47,940,655 - 47,940,677)	CCCCTGTTTCATACTGACCAAAG	23
FBrca	NM_001013416 Canis lupus familiaris BRCA1, UU_Cfam_GSD_1.0/canFam4 chromosome 9 (19,857,442 - 19,857,464)	CAATCCGGTAATAAAGATTTGAC	23	0.35	44
RBrca	NM_001013416 Canis lupus familiaris BRCA1, UU_Cfam_GSD_1.0/canFam4 chromosome 9 (19,857,465 - 19,857,485)	GTTGCATGCTTCTCAGTGGTG	21	0.52

## Sheet: Synthetic templates
Name	Comment	Sequence	Expected minA product sizes
Type I synth. ITD Fw	Based on C2 cell line sequence	GTTTACATAGACCCAACACAGCTTCCTTACGATCACAAATGGGAGTTTCCCAGAACATACCCAACACAGCTTCCTTACGATCACAAATGGGAGTTTCCCAGAAACAGGCTGAGCTTTGGTCAGTATGAAATAGGGGCTTTCCATGTAACCTTTTTGTGTACGTGTAACAATGACTTTAG	44 bp + 92 bp
Type I synth. ITD R+C	Based on C2 cell line sequence	CTAAAGTCATTGTTACACGTACACAAAAAGGTTACATGGAAAGCCCCTATTTCATACTGACCAAAGCTCAGCCTGTTTCTGGGAAACTCCCATTTGTGATCGTAAGGAAGCTGTGTTGGGTATGTTCTGGGAAACTCCCATTTGTGATCGTAAGGAAGCTGTGTTGGGTCTATGTAAAC
Type II synth. ITD Fw	Based on MS tumour sequence	AATTATGTTTACATAGACCCAACACAGCTTCCTTACGATCACAAATGGGAGTTTCCCAGAAACAGGCTGAGCTTTGGTACACAGCTTCCTTACGATCACAAATGGGAGTTTCCCAGAAACAGGCTGAGCTTTGGTCAGTATGAAATAGGGGCTTTCCATGTAACCTTTTTGTGTACGTG	44bp + 44bp +101bp

## Sheet: PCR reactions
Standard PCR
				Step	Temperature	Time
One reaction				1	94oC	2 minutes
Reagent	Amount (ul)			2	94oC	15 seconds	35 cycles
Water	22.8			3	58oC	30 seconds
5x Easy Green buffer	10			4	68oC	30 seconds
MgCl2 25mM	4			5	4oC	Hold
Primer 1F 10 uM	1
Primer 2R 10 uM	1
10 mM dNTPs	1
GoTaq	0.2
Template to 10 ul	10
Total	50
qPCR
			Stage	Step	Temperature	Time
One reaction			Hold	1	50oC	2 minutes
Reagent	Amount (ul)			2	95oC	2 minutes
2 x PowerUp SYBR Green Master Mix	10		Amplification	3	95oC	1 second	40 cycles
Primer 1F 10 uM	1			4	60oC	30 seconds
Primer 2R 10 uM	1		Melt curve	5	95oC	15 seconds
Template and water to 10 ul	8			6	60oC	1 minute
				7	Ramping of 0.05oC/s
Total	20			8	95oC	15 seconds
			Hold	9	4oC	Hold
			Ramping speed was 2.63oC/s up, 2.42oC down except during the melt curve readings
